# Supplementary material for: The non-innocent nature of graphene oxide as a theranostic platform for biomedical applications and its reactivity towards metal-based anticancer drugs
Source: Royal Society of Chemistry journal article supplement (doi:10.1039/c5ra13831k), 2015-01-01
Supplement: c5ra13831k1.pdf [file c5ra13831k1.pdf]

**ELECTRONIC SUPPORTING INFORMATION (ESI)**

**The Non-Innocent Nature of Graphene Oxide as Theranostic Platform for Biomedical Applications and its Reactivity towards Metal-Based Anticancer Drugs**

Audrey Mokdad,<sup>a\*</sup> Konstantinos Dimos,<sup>b</sup> Giorgio Zoppellaro,<sup>a\*</sup> Jiri Tucek,<sup>a</sup> Jason A. Perman,<sup>a</sup> Ondrej Malina,<sup>a</sup> K. Kristoffer Andersson,<sup>c</sup> Kasibhatta Kumara Ramanatha Datta,<sup>a</sup> Jens Peter Froning<sup>a</sup> and Radek Zboril<sup>a\*</sup>

## Theoretical calculations (geometry optimization Fe-Pz<sub>2</sub>Py)

Input File (Spartan 14) for the calculation of the geometry optimized structure of Fe-Pz<sub>2</sub>Py (charge = +2, multiplicity = 5)

```
MEM_TOTAL 2000 # MB [ 4 processes ]
Processing $rem in C:/Program Files/Wavefunction/Spartan14v100/P4e/../../auxdir/config/preferences.
(Site specific preferences)
... THRESH 9
... SCF_CONVERGENCE 7
... SMALL_PROD_XCMAT 9
... BASIS_LIN_DEP_THRESH 5
... SCF_ALGORITHM DIIS_GDM
... MAXSCF 100
... MAXDIIS 50
... THRESHDIIS -1 (i.e. don't switch on delta-E)
... ONEEXE_SPAR TRUE
... GUI GUI_SPARTAN
... TERSE_OUTPUT TRUE
Processing $rem in input file
... JOBTYP OPT
... TIDY_SYM TRUE
... EXCHANGE M06
... CORRELATION none (built-in)
... INCDFE FALSE (N/A in MetaGGA)
... IGRDTY 70000302 (70,302) M06* default
... PSEUDOPOTENTIAL LACVP
... IGRDTY 70000302 (70,302)
... MAXSCF 1000
... UNRESTRICTED TRUE (setting default UHF)
... VARTHRESH 2 (default DFT)
... BASIS LACVP*
... GEOM_OPT_HESSIAN READ
... EXTERNAL_HESSIAN 1
... GUI GUI_SPARTAN
... TERSE_OUTPUT TRUE
```

## Coordinate (xyz) of the Fe-Pz<sub>2</sub>Py complex from optimized geometry

|      |   | Coordinates (Angstroms) |           |           |
|------|---|-------------------------|-----------|-----------|
| ATOM |   | X                       | Y         | Z         |
| 1    | H | 0.000000                | 0.000000  | 4.752645  |
| 2    | C | 0.000000                | 0.000000  | 3.665240  |
| 3    | N | 0.000000                | 0.000000  | 0.929633  |
| 4    | C | -1.213099               | 0.001082  | 2.982360  |
| 5    | C | 1.213099                | -0.001082 | 2.982360  |
| 6    | C | 1.155745                | -0.001370 | 1.596865  |
| 7    | C | -1.155745               | 0.001370  | 1.596865  |
| 8    | H | -2.154863               | 0.001366  | 3.522046  |
| 9    | H | 2.154863                | -0.001366 | 3.522046  |
| 10   | N | -2.284786               | 0.002812  | 0.763129  |
| 11   | N | -2.102030               | -0.002947 | -0.589849 |
| 12   | C | -3.324671               | 0.001178  | -1.109418 |
| 13   | C | -4.310481               | 0.009849  | -0.106597 |
| 14   | C | -3.613793               | 0.010761  | 1.073677  |
| 15   | H | -3.453156               | -0.001888 | -2.186249 |
| 16   | H | -5.384785               | 0.015066  | -0.232088 |
| 17   | H | -3.961376               | 0.016654  | 2.099078  |
| 18   | N | 2.284786                | -0.002812 | 0.763129  |
| 19   | C | 3.613793                | -0.010761 | 1.073677  |
| 20   | C | 4.310481                | -0.009849 | -0.106597 |
| 21   | C | 3.324671                | -0.001178 | -1.109418 |
| 22   | N | 2.102030                | 0.002947  | -0.589849 |

|    |    |           |           |           |
|----|----|-----------|-----------|-----------|
| 23 | H  | 3.961376  | -0.016654 | 2.099078  |
| 24 | H  | 5.384785  | -0.015066 | -0.232088 |
| 25 | H  | 3.453156  | 0.001888  | -2.186249 |
| 26 | Fe | 0.000000  | 0.000000  | -1.208249 |
| 27 | O  | -0.013334 | 2.152433  | -1.526782 |
| 28 | H  | 0.759561  | 2.711368  | -1.352350 |
| 29 | H  | -0.795144 | 2.698706  | -1.351748 |
| 30 | O  | 0.000000  | 0.000000  | -3.291293 |
| 31 | H  | 0.007136  | -0.789511 | -3.854483 |
| 32 | H  | -0.007136 | 0.789511  | -3.854483 |
| 33 | O  | 0.013334  | -2.152433 | -1.526782 |
| 34 | H  | 0.795144  | -2.698706 | -1.351748 |
| 35 | H  | -0.759561 | -2.711368 | -1.352350 |

Point Group: c2    Number of degrees of freedom: 48  
Energy = -1050.057740208 au

**Figure S1.** The optimized structure of Fe-Pz<sub>2</sub>Py with the relevant Fe-N/O distances, spin density isosurface and Mulliken atomic charges as calculated by DFT UM06/6-31G\*/LanL2DZ.

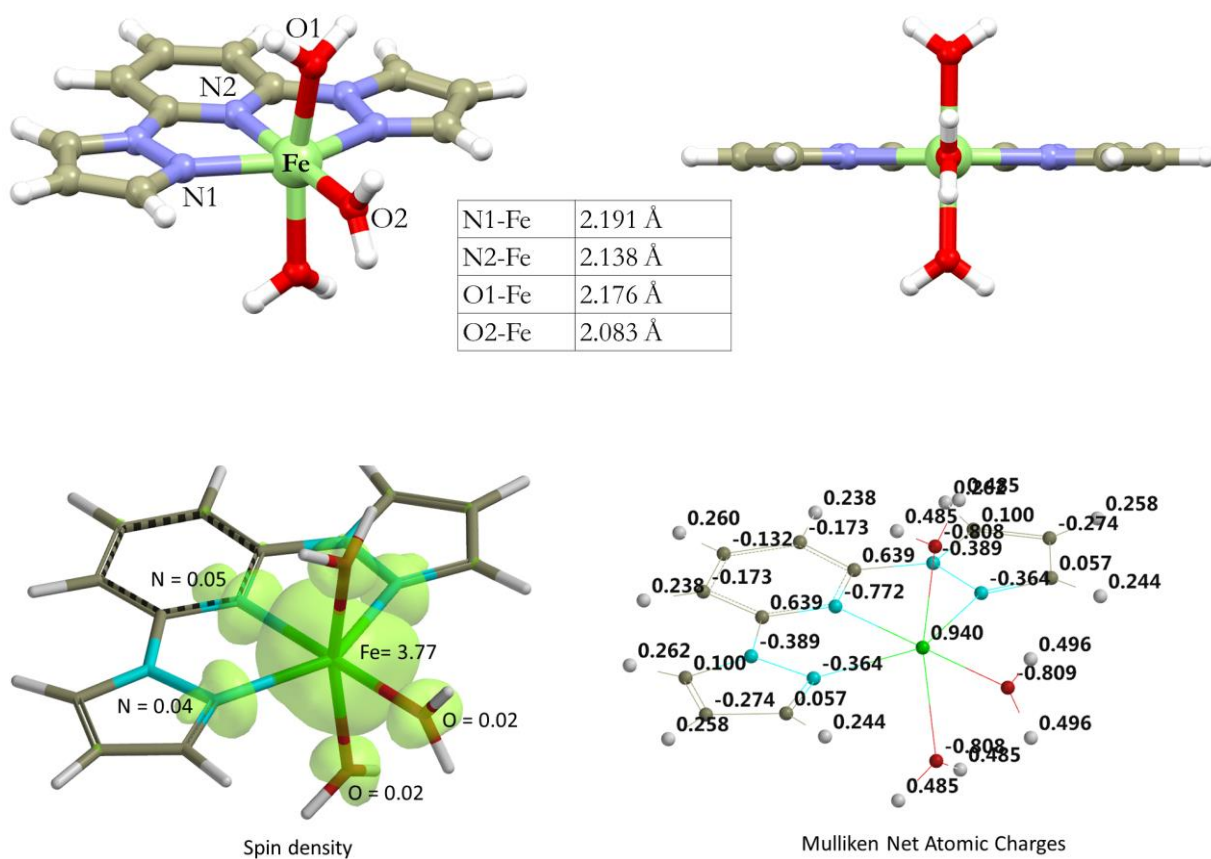

**Figure S2.** Mossbauer spectra of Fe-Pz<sub>2</sub>Py (powder) recorded at  $T = 300$  K (a) and  $T = 5$  K (b) validating the presence in the complex of only Fe(II) cation in high spin ( $S = 2$ ) state.

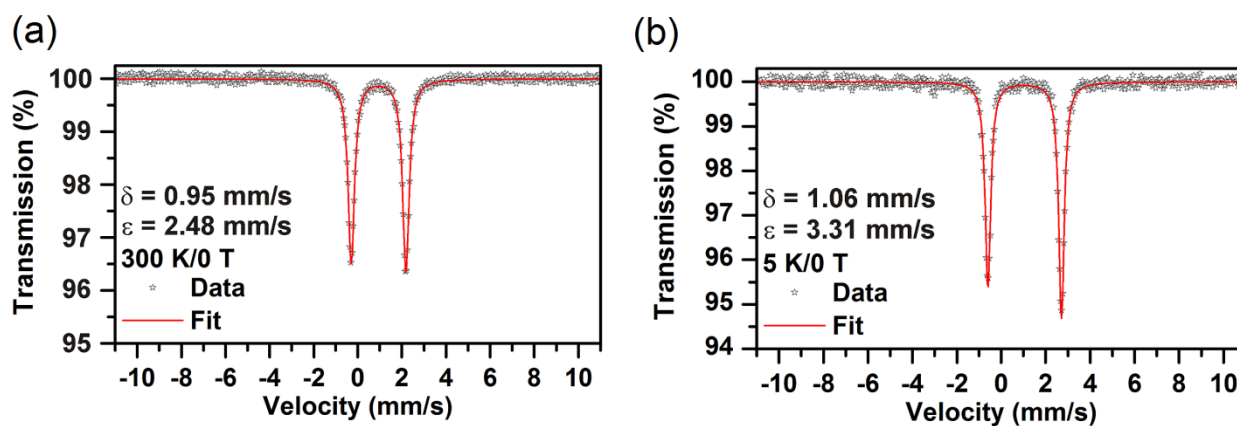

**Figure S3.** FT-IR spectra of GO (a), Fe-Pz<sub>2</sub>Py/GO (b) and Fe-Pz<sub>2</sub>Py (c).

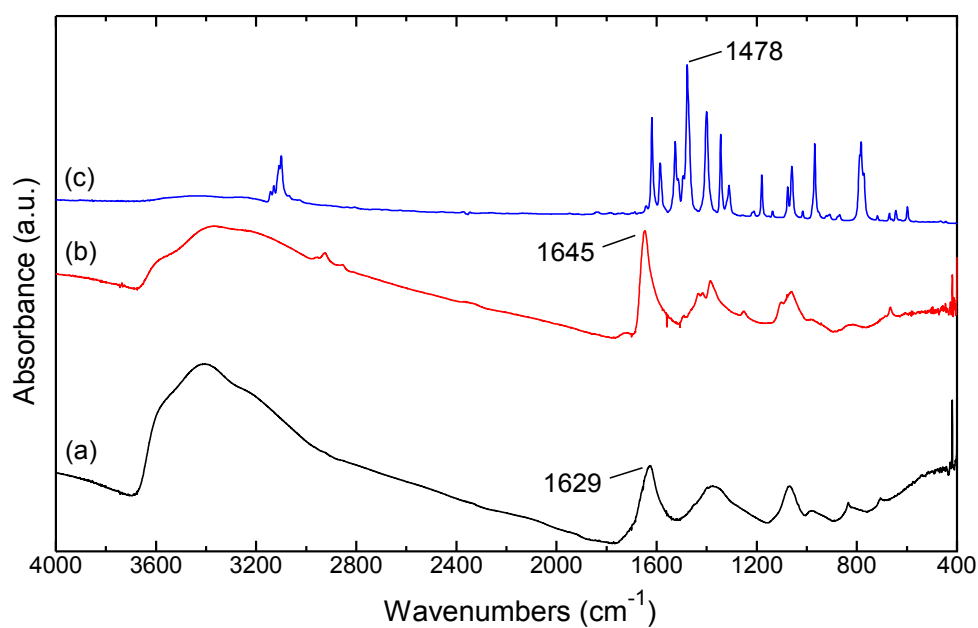

Figure S4. Raman spectra of GO (a), and Fe-Pz<sub>2</sub>Py/GO (b)

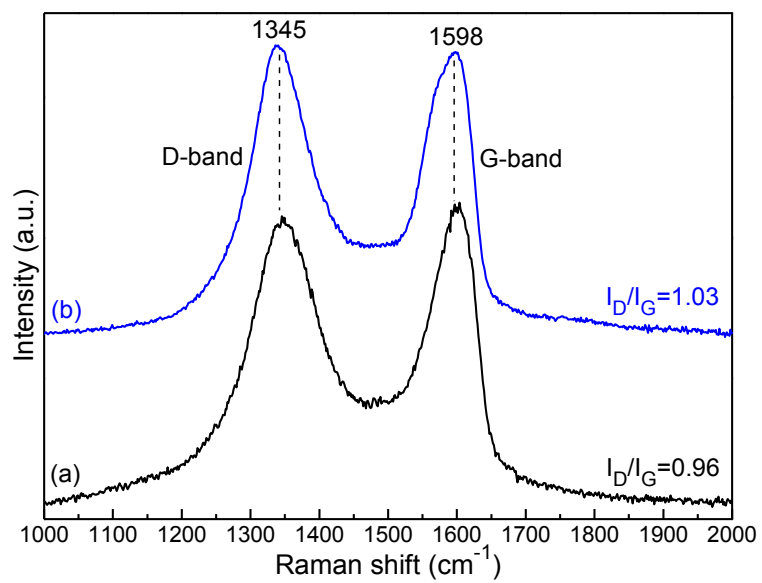

**Figure S5.** DTA/TG%/DTG curves of GO (a), Fe-Pz<sub>2</sub>Py (b) and Fe-Pz<sub>2</sub>Py/GO (c)

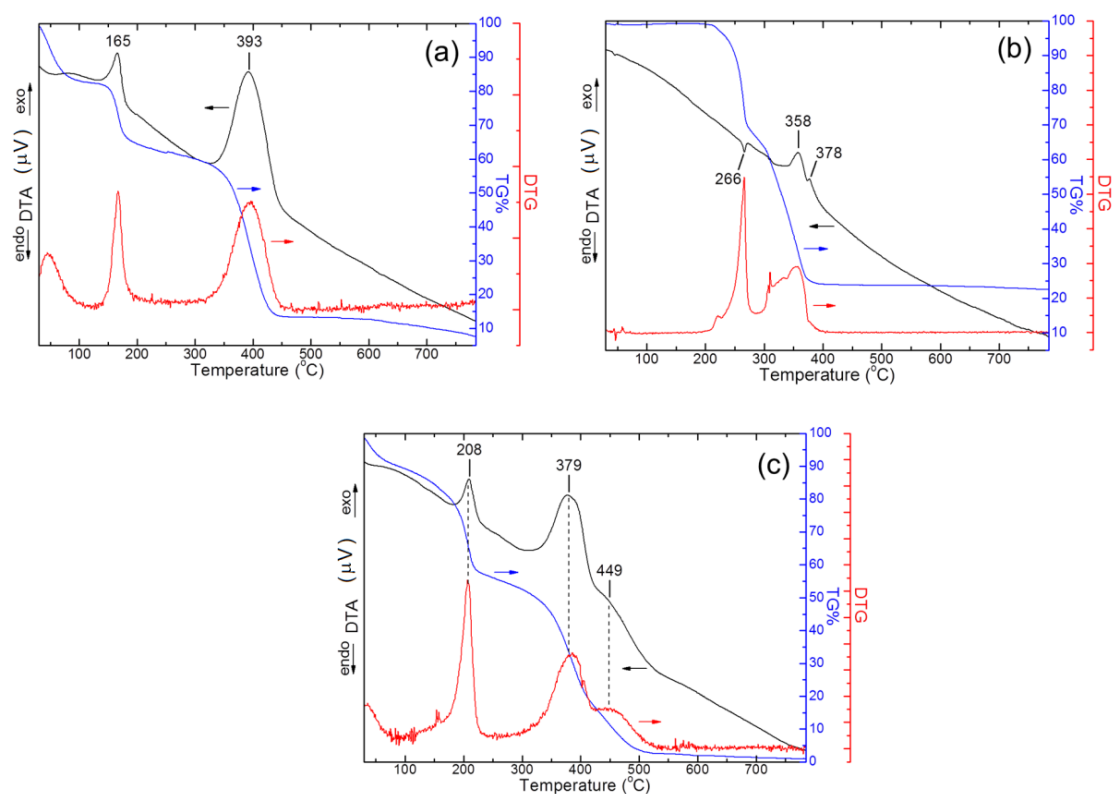

Comparison of all DTA/TG%/DTG curves of GO, Fe-Pz<sub>2</sub>Py and Fe-Pz<sub>2</sub>Py/GO clearly confirms the formation of the hybrids system (Fe-Pz<sub>2</sub>Py/GO). GO materials exhibit two exothermic peaks; one at around 160-210 °C and one at ~400 °C (Panel a), that are ascribed to their decomposition and combustion respectively. The hybrid material demonstrates additional exothermic peaks which are associated with the Fe-Pz<sub>2</sub>Py content and its combustion (Panel c). All exothermic peaks are accompanied by corresponding weight losses which are better displayed by the DTG signals. Moreover, in the temperature region ~130-550 °C which includes all decomposing and combustion of organic/inorganic carbon-based content of the materials, Fe-Pz<sub>2</sub>Py/GO losses 85% of its weight, and GO just 69%. This difference is associated with the Fe-Pz<sub>2</sub>Py presence (Panel b). Thus, while combustion peaks of pristine GO and Fe-Pz<sub>2</sub>Py are overlapping and the exact Fe-Pz<sub>2</sub>Py content cannot be exactly calculated, an estimation from the TG% signal leads to ~16 wt% Fe-Pz<sub>2</sub>Py content for Fe-Pz<sub>2</sub>Py/GO. This amount of loaded Fe-Pz<sub>2</sub>Py has been further validated by atomic absorption spectroscopy following analysis of the Fe cation ( $16.3 \pm 0.3$  wt% of Fe-Pz<sub>2</sub>Py in the hybrid). After drying the sample Fe-Pz<sub>2</sub>Py/GO being kept in water for weeks no significant signal shifts or changes in the DTA/TG%/DTG relative intensity were observed, indicating a highly stable material, both as dry powder and in solution, even after prolonged storage.

**Figure S6.** The N1s core level X-ray photoemission spectra of sample Fe-Pz<sub>2</sub>Py/GO.

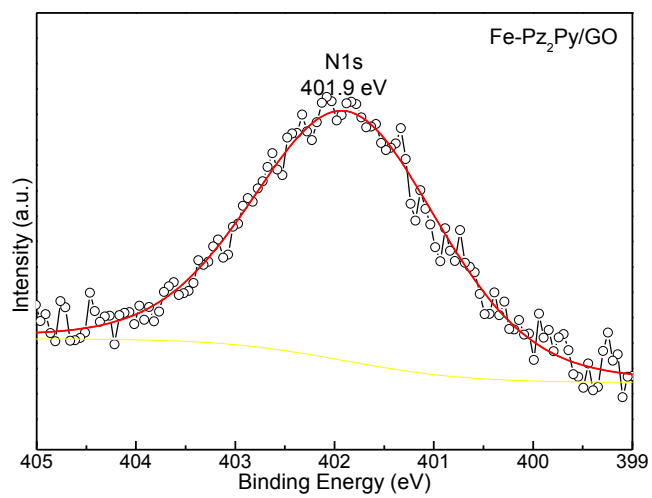

**Figure S7.** The SEM and TEM micrographs of the drug loaded GO composite (Fe-Pz<sub>2</sub>Py/GO).

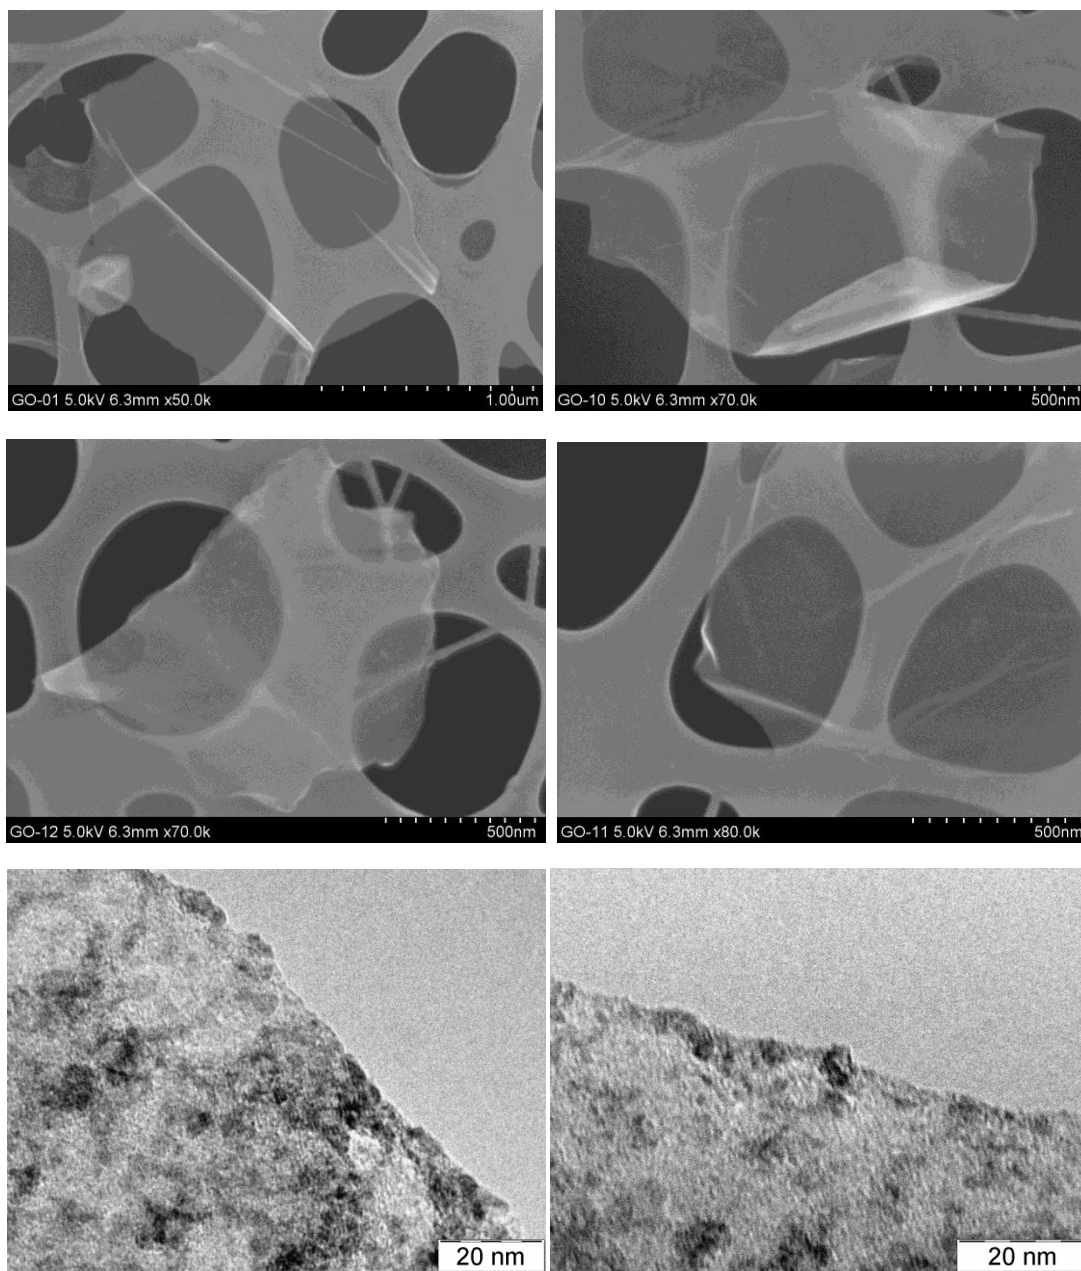



**Figure S8.** The UV-Vis spectrum of Fe-Pz<sub>2</sub>Py in water (0.03 mM) (b) and the calculated absorption envelope (a) by TDDFT-UEDF2/6-31G\*\* in vacuum (excited states = 30, frozen cores = 28).

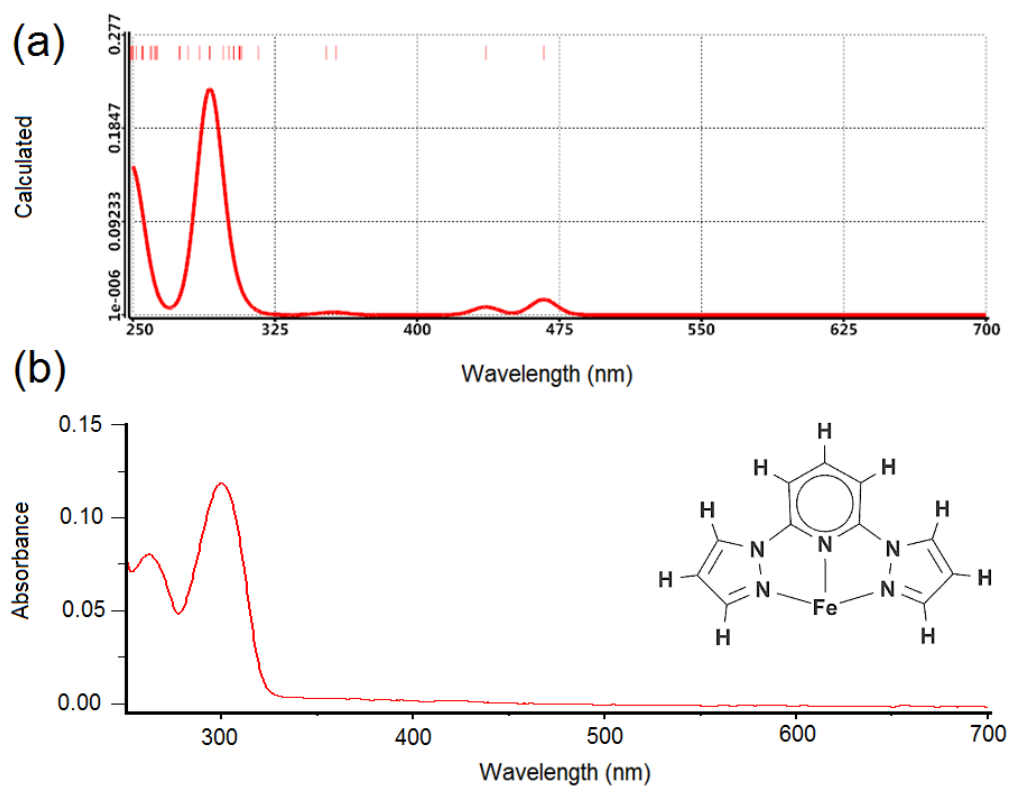

**Figure S9.** Steady-state optical absorption spectra of Fe-Pz<sub>2</sub>Py in water in presence of increasing amounts of DNA showing the absorbance changes with the increase of DNA concentration.

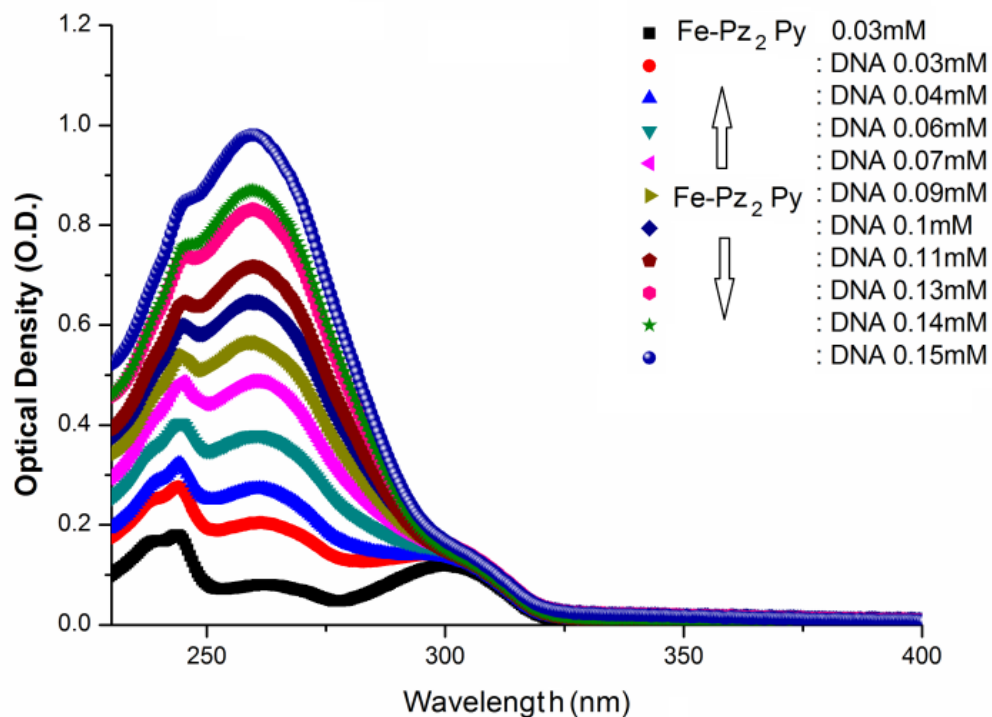

The optical spectrum of the Fe-Pz<sub>2</sub>Py complex (black line) displays transitions centered at ~ 238nm, 243nm, 262nm, 300nm and between 350-400 nm. The 475 nm band likely arises from a charge transfer transition between the iron and the nitrogen-ligands of the Pz<sub>2</sub>Py backbone.

**Figure S10.** Confocal microscopy images of the mouse fibroblast NIH 3T3 cells culture without (a) and with 50 $\mu$ M (IC<sub>50</sub>) of Fe-Pz<sub>2</sub>Py (b). Cells were maintained at 37°C with 5% humidified CO<sub>2</sub> in an incubation chamber for 24 hours. Images were collected using an optical microscope (Olympus IX 70) with an objective of 40 $\times$ .

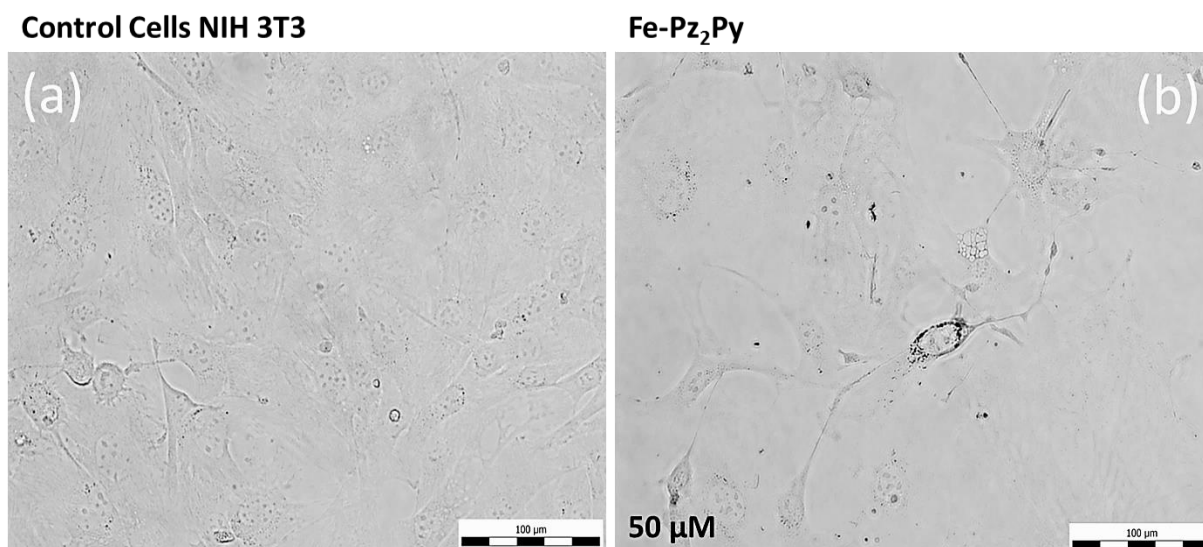

#### NOTE:

It is interesting to report also that when the cell line NIH 3T3 (mouse fibroblasts) was used in the cytotoxicity screening for Fe-Pz<sub>2</sub>Py, the calculated IC<sub>50</sub> decreased considerably, down to 50  $\mu$ M, showing that the L929 cells are less affected to the drug exposure. Kamatchi et al. demonstrated that the IC<sub>50</sub> for NIH 3T3 cells equals to 177 $\mu$ M for cisplatin and 109 $\mu$ M to 248 $\mu$ M for different types or ruthenium complexes containing bidentate carboxylates ligands, hence Fe-Pz<sub>2</sub>Py is more toxic than cis-Pt and Ru-based drugs against the NIH 3T3 cell's line.

#### Reference

T. S. Kamatchi, N. Chitrapriya, H. Lee, C. F. Fronczek, F. R. Fronczek, K. Natarajan, *Dalton Trans.*, 2012, **41**, 2066-2077.

**Figure S11.** Fluorescence quenching spectra of Fe-Pz<sub>2</sub>Py at different concentrations of base pairs at 298 K; Fe-Pz<sub>2</sub>Py = 0.03 mM, Base pairs from 0.015 mM to 0.15 mM ( $E_{ex}$  = 295 nm) with (a) Adenine, (b) Thymine, (c) Guanine and (d) Cytosine. The arrows in (b) and (d) indicate the fluorescence quenching process.

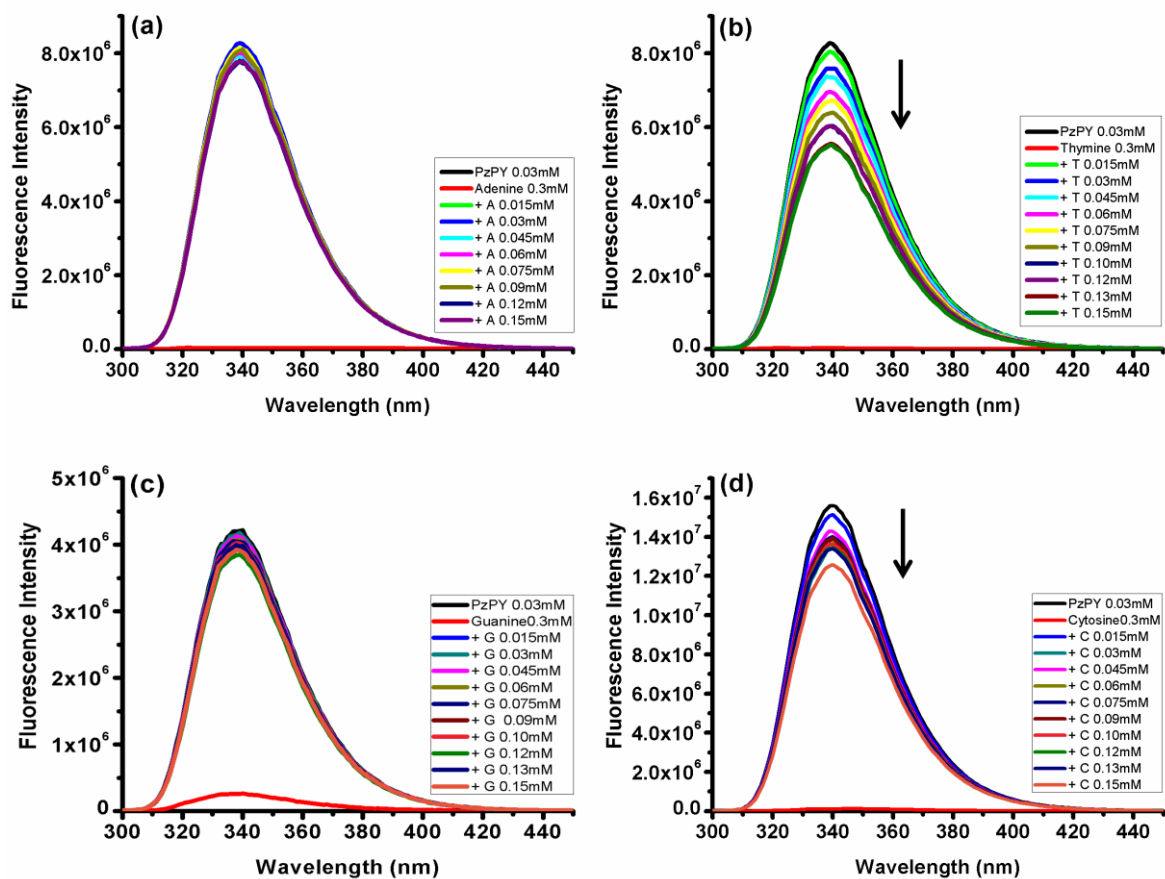

**Figure S12.** Stern-Volmer plot of the binding of Fe-Pz<sub>2</sub>Py to DNA (a), thymine (b) and cytosine (c) recorded at room temperature. Plot of  $\log[(F_0-F)/F]$  vs  $\log$  [Substrate] for the binding of Fe-Pz<sub>2</sub>Py to DNA (d), thymine (e) and cytosine (f). The Table in the bottom shows a summary of the constant  $K_q$ ,  $K_{sv}$ ,  $K$  and  $n$  for DNA, thymine and cytosine.

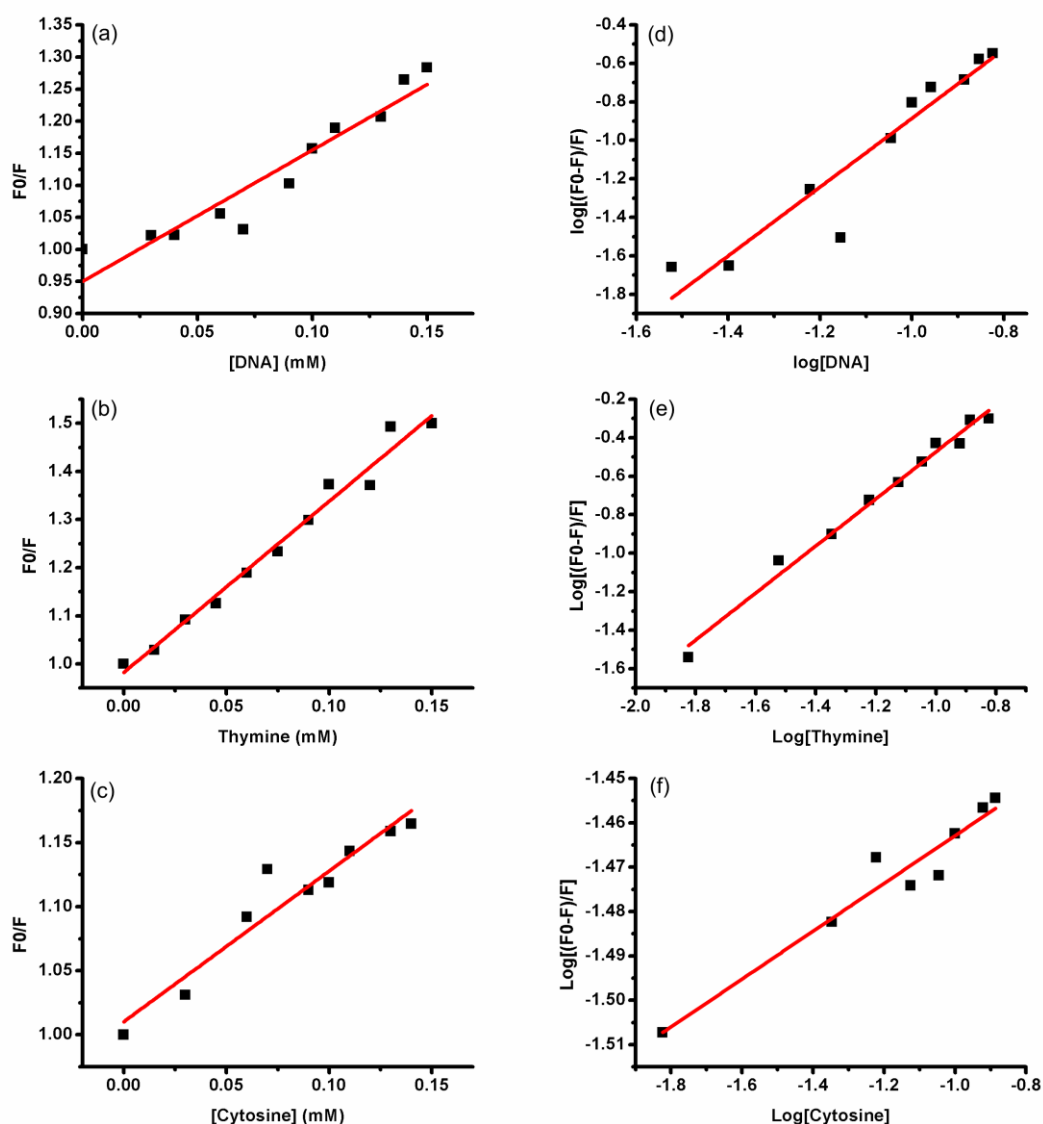

**Table S1**

|                 | $K_q$ ( $M^{-1}s^{-1}$ ) | $K_{sv}$ ( $M^{-1}$ ) | $K$ ( $M^{-1}$ ) | $n$  |
|-----------------|--------------------------|-----------------------|------------------|------|
| <b>DNA</b>      | $2.0 \times 10^{11}$     | $2.0 \times 10^3$     | $7.9 \pm 1.6$    | 1.8  |
| <b>Thymine</b>  | $7.2 \times 10^{12}$     | $3.6 \times 10^3$     | $5.0 \pm 1.1$    | 1.2  |
| <b>Cytosine</b> | $2.4 \times 10^{12}$     | $1.2 \times 10^3$     | $0.04 \pm 1$     | 0.05 |

**Note:** Using the following equation, the formation of complex between Fe-Pz<sub>2</sub>Py and DNA, thymine or cytosine can be confirmed from the values of quenching rate constant  $K_q$ :

$$K_q = K_{sv}/\tau_0$$

where  $\tau_0$  is the average lifetime of the molecule without the quencher. For various quenchers, the maximum scatter collision quenching constant,  $K_q$ , with biopolymer is  $2 \times 10^{10} M^{-1}s^{-1}$ . If we assume the lifetime ( $\tau_0$ ) ( $10^{-12} s^{-1}$ ) of the calf thymus, which is equal to 10 ps, is similar to the salmon sperm DNA, then we can extract  $K_q$ .

## Theoretical calculations (UV-Vis of Fe-Pz<sub>2</sub>Py)

Input File (Spartan 14) for the calculation of the UV-Vis spectrum of Fe-Pz<sub>2</sub>Py (charge = +2, multiplicity = 5) as shown in Figure S7.

Job type: Single point.

Excited States: 30

Method: UEDF2(FC)

Basis set: 6-31G\*\*

Number of shells: 128

Number of basis functions: 389

Charge : +2

Multiplicity: 5

Processing \$rem in C:/Program Files/Wavefunction/Spartan14v100/P4e/../../auxdir/config/preferences.

(Site specific preferences)

```
... THRESH          9
... SCF_CONVERGENCE  7
... SMALL_PROD_XCMAT  9
... BASIS_LIN_DEP_THRESH  5
... SCF_ALGORITHM    DIIS_GDM
... MAXSCF           100
... MAXDIIS          50
... THRESHDIIS       -1 (i.e. don't switch on delta-E)
... ONEEXE_SPAR      TRUE
... GUI              GUI_SPARTAN
... TERSE_OUTPUT     TRUE
```

Processing \$rem in input file

```
... EXCHANGE         EDF2
... CORRELATION       None (default)
... BASIS             6-31G**
... CIS_N_ROOTS       6
... CIS_STATE_DERIV   1
... IGRDTY            70000302 (70,302)
... MAXSCF           1000
... CIS_N_ROOTS       30
... N_FROZEN_CORE     28
... UNRESTRICTED     TRUE (setting default UHF)
... VARTHRESH         2 (default DFT)
... INCDFT            TRUE (default DFT)
... GUI              GUI_SPARTAN
... TERSE_OUTPUT     TRUE
```

-----  
**TDDFT/TDA Excitation Energies**  
-----

Excited state 1: excitation energy (eV) = 0.0391  
Total energy for state 1: -2190.442481939248  
<S\*\*2> : 6.0110  
Trans. Mom.: 0.1355 X 0.0013 Y 0.0000 Z  
Strength : 0.0000  
D( 52) --> S( 1) amplitude = 0.8220 beta  
D( 52) --> S( 4) amplitude = 0.5426 beta

Excited state 2: excitation energy (eV) = 0.1262  
Total energy for state 2: -2190.439281151341  
<S\*\*2> : 6.0072  
Trans. Mom.: 0.0000 X 0.0000 Y 0.0035 Z  
Strength : 0.0000  
D( 52) --> S( 3) amplitude = 0.9883 beta

Excited state 3: excitation energy (eV) = 0.9847  
Total energy for state 3: -2190.407733138254  
<S\*\*2> : 6.0061  
Trans. Mom.: -0.0024 X 0.0104 Y 0.0000 Z  
Strength : 0.0000  
D( 52) --> V( 1) amplitude = 0.9631 beta  
D( 52) --> V( 4) amplitude = 0.2099 beta

Excited state 4: excitation energy (eV) = 1.4444  
Total energy for state 4: -2190.390838883862  
<S\*\*2> : 6.0077  
Trans. Mom.: 0.0021 X 0.0059 Y 0.0000 Z  
Strength : 0.0000  
D( 52) --> V( 1) amplitude = -0.2189 beta  
D( 52) --> V( 2) amplitude = -0.5845 beta  
D( 52) --> V( 4) amplitude = 0.7228 beta  
D( 52) --> V( 7) amplitude = 0.2655 beta

Excited state 5: excitation energy (eV) = 2.6563  
Total energy for state 5: -2190.346301921167  
<S\*\*2> : 7.1826  
Trans. Mom.: 0.0000 X 0.0000 Y 0.4812 Z  
Strength : 0.0151  
D( 52) --> S( 2) amplitude = 0.9733 beta

Excited state 6: excitation energy (eV) = 2.8418  
Total energy for state 6: -2190.339484954966  
<S\*\*2> : 7.0280  
Trans. Mom.: -0.3322 X -0.0006 Y 0.0000 Z  
Strength : 0.0077  
D( 52) --> S( 1) amplitude = -0.5546 beta  
D( 52) --> S( 4) amplitude = 0.8213 beta

Excited state 7: excitation energy (eV) = 3.4719  
Total energy for state 7: -2190.316328029332  
<S\*\*2> : 7.7851  
Trans. Mom.: 0.0000 X 0.0000 Y -0.1419 Z  
Strength : 0.0017  
S( 4) --> V( 2) amplitude = -0.6091 alpha  
D( 51) --> S( 1) amplitude = 0.6531 beta  
D( 51) --> S( 4) amplitude = -0.3240 beta

Excited state 8: excitation energy (eV) = 3.5206

Total energy for state 8: -2190.314538389789  
<S\*\*2> : 7.9817  
Trans. Mom.: -0.1036 X -0.0001 Y 0.0000 Z  
Strength : 0.0009  
S( 4) --> V( 1) amplitude = 0.7053 alpha  
D( 51) --> S( 2) amplitude = 0.6670 beta

Excited state 9: excitation energy (eV) = 3.9212  
Total energy for state 9: -2190.299818806492  
<S\*\*2> : 6.2670  
Trans. Mom.: 0.0005 X -0.0689 Y 0.0000 Z  
Strength : 0.0005  
S( 3) --> V( 1) amplitude = 0.9925 alpha

Excited state 10: excitation energy (eV) = 4.0335  
Total energy for state 10: -2190.295692020174  
<S\*\*2> : 7.7892  
Trans. Mom.: 0.0000 X 0.0000 Y -0.0793 Z  
Strength : 0.0006  
S( 1) --> V( 2) amplitude = 0.3795 alpha  
S( 2) --> V( 1) amplitude = -0.4473 alpha  
D( 49) --> S( 1) amplitude = 0.3934 beta  
D( 49) --> S( 4) amplitude = -0.1720 beta  
D( 50) --> S( 2) amplitude = 0.4524 beta  
D( 52) --> V( 3) amplitude = -0.2941 beta

Excited state 11: excitation energy (eV) = 4.0457  
Total energy for state 11: -2190.295241064957  
<S\*\*2> : 7.7855  
Trans. Mom.: 0.0372 X -0.0030 Y 0.0000 Z  
Strength : 0.0001  
D( 52) --> V( 2) amplitude = 0.1641 alpha  
S( 1) --> V( 1) amplitude = -0.4798 alpha  
S( 1) --> V( 3) amplitude = 0.1624 alpha  
S( 2) --> V( 2) amplitude = 0.3586 alpha  
D( 48) --> S( 1) amplitude = 0.1730 beta  
D( 49) --> S( 2) amplitude = 0.3885 beta  
D( 49) --> V( 3) amplitude = -0.1603 beta  
D( 50) --> S( 1) amplitude = 0.5170 beta  
D( 50) --> S( 4) amplitude = -0.1833 beta

Excited state 12: excitation energy (eV) = 4.0517  
Total energy for state 12: -2190.295021136484  
<S\*\*2> : 7.0286  
Trans. Mom.: -0.0009 X -0.0898 Y 0.0000 Z  
Strength : 0.0008  
D( 52) --> V( 2) amplitude = 0.7963 beta  
D( 52) --> V( 4) amplitude = 0.5883 beta

Excited state 13: excitation energy (eV) = 4.0878  
Total energy for state 13: -2190.293695368173  
<S\*\*2> : 6.3860  
Trans. Mom.: 0.0000 X 0.0000 Y -0.3844 Z  
Strength : 0.0148  
S( 4) --> V( 2) amplitude = 0.3528 alpha  
D( 51) --> S( 1) amplitude = 0.6725 beta  
D( 51) --> S( 4) amplitude = 0.5922 beta

Excited state 14: excitation energy (eV) = 4.1230  
Total energy for state 14: -2190.292400956618  
<S\*\*2> : 6.0463  
Trans. Mom.: 0.0781 X 0.0056 Y 0.0000 Z



Strength : 0.0006  
D( 51) --> S( 3) amplitude = 0.9925 beta

Excited state 15: excitation energy (eV) = 4.1639  
Total energy for state 15: -2190.290898737517  
<S\*\*2> : 7.1130  
Trans. Mom.: 0.0000 X 0.0000 Y 0.0623 Z  
Strength : 0.0004  
S( 2) --> V( 1) amplitude = -0.1513 alpha  
D( 52) --> V( 3) amplitude = 0.9317 beta

Excited state 16: excitation energy (eV) = 4.2679  
Total energy for state 16: -2190.287075471239  
<S\*\*2> : 6.0446  
Trans. Mom.: 1.4522 X 0.0022 Y 0.0000 Z  
Strength : 0.2205  
S( 4) --> V( 1) amplitude = -0.6557 alpha  
D( 51) --> S( 2) amplitude = 0.6731 beta

Excited state 17: excitation energy (eV) = 4.3489  
Total energy for state 17: -2190.284101578425  
<S\*\*2> : 6.2351  
Trans. Mom.: 0.0000 X 0.0000 Y -0.0030 Z  
Strength : 0.0000  
S( 3) --> V( 2) amplitude = 0.9946 alpha

Excited state 18: excitation energy (eV) = 4.4406  
Total energy for state 18: -2190.280728831889  
<S\*\*2> : 7.6551  
Trans. Mom.: 0.0000 X 0.0000 Y 0.0213 Z  
Strength : 0.0000  
D( 49) --> V( 1) amplitude = 0.1803 alpha  
D( 50) --> V( 1) amplitude = -0.1554 alpha  
D( 52) --> V( 1) amplitude = 0.4713 alpha  
S( 1) --> V( 2) amplitude = -0.1734 alpha  
S( 2) --> V( 1) amplitude = -0.4502 alpha  
D( 47) --> S( 2) amplitude = -0.2081 beta  
D( 48) --> S( 2) amplitude = -0.3051 beta  
D( 49) --> S( 1) amplitude = -0.3271 beta  
D( 50) --> S( 2) amplitude = 0.3286 beta  
D( 51) --> S( 4) amplitude = -0.1840 beta

Excited state 19: excitation energy (eV) = 4.5145  
Total energy for state 19: -2190.278014781491  
<S\*\*2> : 7.0745  
Trans. Mom.: 0.1570 X 0.0002 Y 0.0000 Z  
Strength : 0.0027  
D( 50) --> V( 2) amplitude = 0.1841 alpha  
S( 1) --> V( 1) amplitude = 0.2508 alpha  
S( 4) --> V( 3) amplitude = 0.2337 alpha  
D( 48) --> S( 1) amplitude = -0.3506 beta  
D( 49) --> S( 2) amplitude = -0.2277 beta  
D( 50) --> S( 1) amplitude = 0.6822 beta  
D( 51) --> V( 3) amplitude = 0.2072 beta

Excited state 20: excitation energy (eV) = 4.7168  
Total energy for state 20: -2190.270581125494  
<S\*\*2> : 6.0450  
Trans. Mom.: 0.0000 X 0.0000 Y -0.0005 Z  
Strength : 0.0000  
D( 50) --> S( 3) amplitude = 0.7568 beta  
D( 51) --> V( 1) amplitude = -0.6430 beta

Excited state 21: excitation energy (eV) = 4.7272  
Total energy for state 21: -2190.270198399535  
<S\*\*2> : 6.0453  
Trans. Mom.: 0.0000 X 0.0000 Y 0.0266 Z  
Strength : 0.0001  
D(50) --> S(3) amplitude = 0.6373 beta  
D(51) --> V(1) amplitude = 0.7637 beta

Excited state 22: excitation energy (eV) = 4.7402  
Total energy for state 22: -2190.269721830728  
<S\*\*2> : 6.9799  
Trans. Mom.: -0.0102 X -0.0018 Y 0.0000 Z  
Strength : 0.0000  
D(50) --> V(2) amplitude = -0.1784 alpha  
S(2) --> V(2) amplitude = -0.4565 alpha  
S(4) --> V(3) amplitude = -0.2975 alpha  
D(48) --> S(1) amplitude = 0.3305 beta  
D(49) --> S(2) amplitude = -0.1682 beta  
D(50) --> S(1) amplitude = 0.4614 beta  
D(50) --> S(4) amplitude = 0.3009 beta  
D(51) --> V(3) amplitude = -0.2815 beta  
D(52) --> V(6) amplitude = -0.2135 beta

Excited state 23: excitation energy (eV) = 4.7693  
Total energy for state 23: -2190.268649819271  
<S\*\*2> : 7.0363  
Trans. Mom.: 0.0000 X 0.0000 Y -0.0447 Z  
Strength : 0.0002  
D(52) --> V(5) amplitude = 0.9709 beta

Excited state 24: excitation energy (eV) = 4.7831  
Total energy for state 24: -2190.268143813801  
<S\*\*2> : 6.1772  
Trans. Mom.: 0.0032 X 0.1695 Y 0.0000 Z  
Strength : 0.0034  
D(51) --> V(1) amplitude = 0.9911 alpha

Excited state 25: excitation energy (eV) = 4.8565  
Total energy for state 25: -2190.265447970550  
<S\*\*2> : 6.5812  
Trans. Mom.: 0.0000 X 0.0000 Y 0.0645 Z  
Strength : 0.0005  
D(49) --> V(1) amplitude = 0.1518 alpha  
D(50) --> V(1) amplitude = 0.2585 alpha  
D(52) --> V(1) amplitude = 0.4164 alpha  
S(1) --> V(2) amplitude = 0.2857 alpha  
S(2) --> V(1) amplitude = 0.5313 alpha  
S(4) --> V(2) amplitude = 0.1630 alpha  
D(48) --> S(2) amplitude = 0.2358 beta  
D(50) --> S(2) amplitude = 0.3401 beta  
D(51) --> S(4) amplitude = -0.2163 beta  
D(52) --> V(5) amplitude = 0.1563 beta

Excited state 26: excitation energy (eV) = 4.8664  
Total energy for state 26: -2190.265083234634  
<S\*\*2> : 6.9060  
Trans. Mom.: 0.0000 X 0.0000 Y -0.0542 Z  
Strength : 0.0004  
D(50) --> V(1) amplitude = -0.3212 alpha  
D(52) --> V(1) amplitude = -0.3518 alpha  
S(2) --> V(1) amplitude = 0.2945 alpha

S( 4) --> V( 6) amplitude = -0.1500 alpha  
D( 47) --> S( 2) amplitude = 0.3149 beta  
D( 49) --> S( 1) amplitude = -0.2279 beta  
D( 50) --> S( 2) amplitude = 0.5930 beta

Excited state 27: excitation energy (eV) = 4.9245  
Total energy for state 27: -2190.262949246336  
<S\*\*2> : 7.1325  
Trans. Mom.: -0.2780 X 0.0001 Y 0.0000 Z  
Strength : 0.0093  
S( 1) --> V( 1) amplitude = -0.2203 alpha  
S( 2) --> V( 2) amplitude = -0.2649 alpha  
D( 50) --> S( 4) amplitude = 0.2323 beta  
D( 52) --> V( 6) amplitude = 0.8696 beta

Excited state 28: excitation energy (eV) = 4.9592  
Total energy for state 28: -2190.261672027625  
<S\*\*2> : 6.0473  
Trans. Mom.: 0.0285 X 0.0339 Y 0.0000 Z  
Strength : 0.0002  
D( 49) --> S( 3) amplitude = 0.9805 beta

Excited state 29: excitation energy (eV) = 4.9651  
Total energy for state 29: -2190.261457242253  
<S\*\*2> : 7.0578  
Trans. Mom.: 0.0000 X 0.0000 Y -0.0568 Z  
Strength : 0.0004  
D( 52) --> V( 1) amplitude = 0.4462 alpha  
S( 2) --> V( 1) amplitude = 0.1816 alpha  
S( 4) --> V( 2) amplitude = 0.1838 alpha  
S( 4) --> V( 6) amplitude = -0.1596 alpha  
D( 47) --> S( 2) amplitude = 0.1853 beta  
D( 48) --> S( 2) amplitude = -0.3610 beta  
D( 49) --> S( 1) amplitude = 0.5864 beta

Excited state 30: excitation energy (eV) = 4.9857  
Total energy for state 30: -2190.260697917812  
<S\*\*2> : 6.6327  
Trans. Mom.: 0.0000 X 0.0000 Y 1.0615 Z  
Strength : 0.1376  
D( 49) --> V( 1) amplitude = 0.2710 alpha  
D( 50) --> V( 1) amplitude = -0.1608 alpha  
S( 1) --> V( 2) amplitude = -0.2231 alpha  
S( 2) --> V( 1) amplitude = 0.2421 alpha  
S( 4) --> V( 2) amplitude = -0.3683 alpha  
D( 47) --> S( 2) amplitude = -0.3365 beta  
D( 49) --> S( 1) amplitude = 0.4039 beta  
D( 49) --> S( 4) amplitude = 0.3221 beta  
D( 50) --> S( 2) amplitude = 0.2576 beta  
D( 51) --> S( 4) amplitude = 0.2642 beta
